# Supplementary material
Source: Springer Nature journal article supplement (https://www.springermedizin.de/resource/supplementary/12889_2010_3230_MOESM4_ESM.pdf/9488436)

Molar teeth

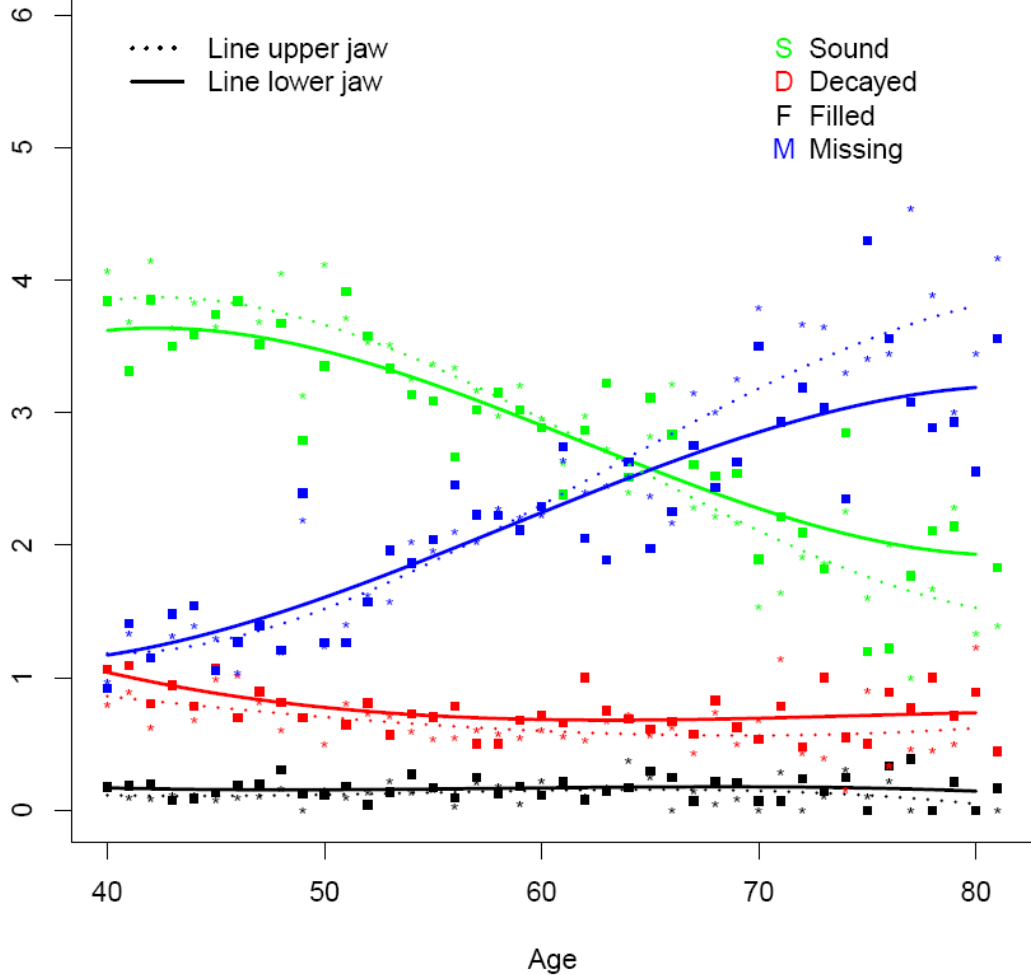

Supplement: MOESM4 [file 9488436]
